# Supplementary material
Source: publisher figshare collection journal article supplement (https://karger.figshare.com/ndownloader/files/22746086)
Supplement: Supplementary file 1 [file 22746086]

Supplement table 1. Comorbidity and onset age of rhinitis according to the number of sensitized allergens among patients with poly-sensitized rhinitis

| Number of sensitized allergens | **2** | **3** | **4** | **5** | 6 | **9** | ***P-value**** |
| --- | --- | --- | --- | --- | --- | --- | --- |
| No. of patients | 179 | 74 | 46 | 17 | 7 | 2 |  |
| Age, years old******** | 41.2 (16.6) | 40.6 (15.1) | 41.6 (15.2) | 36.8 (17.9) | 35.1 (13.9) | 42.5 (13.4) | 0.822 |
| Sex, male, n (%) | 66 (36.9) | 31 (41.9) | 22 (47.8) | 8 (47.1) | 1 (14.3) | 1 (50.0) | 0.472 |
| Onset age of rhinitis******** | 35.3 (17.6) | 34.1 (16.4) | 36.1 (16.5) | 28.9 (18.0) | 25.3 (12.5) | 42.0 (12.7) | 0.407 |
| Comorbidities, n (%) |  |  |  |  |  |  |  |
| Conjunctivitis | 63 (35.2) | 31 (41.9) | 19 (41.3) | 5 (29.4) | 0 (0.0) | 2 (100.0) | 0.097 |
| Asthma | 11 (6.1) | 5 (6.8) | 1 (2.2) | 0 (0.0) | 2 (28.6) | 1 (50.0) | **0.010†** |
| Eczema | 20 (11.2) | 9 (12.2) | 5 (10.9) | 5 (29.4) | 1 (14.3) | 0 (0.0) | 0.390 |

******* Among all groups

******** Mean (SD)

† There were no differences among the patients sensitized to from 2 to 5 allergens (p = 0.498)
